# Supplementary material
Source: PubMed Central journal article supplement (PMC1820924)
Supplement: plntphys_pp.106.093435_1.pdf [file plntphys_pp.106.093435_1.pdf]

**Supplemental Table 1. Quantitative PCR thermal cycle conditions and efficiency.**

| Gene Name       | AGI number                | Thermal Cycle Condition | Mean Efficiency |
|-----------------|---------------------------|-------------------------|-----------------|
| <i>AtNOS1</i>   | <a href="#">At3g47450</a> | A                       | 0.930           |
| <i>AtCPI1</i>   | <a href="#">At4g36880</a> | B                       | 1.000           |
| <i>AtGA3ox1</i> | <a href="#">At1g15550</a> | A                       | 1.041           |
| <i>AtGA3ox2</i> | <a href="#">At1g80340</a> | C                       | 1.002           |
| <i>ICL</i>      | <a href="#">At3g21720</a> | D                       | 0.911           |
| <i>MS</i>       | <a href="#">At5g03860</a> | A                       | 0.928           |
| <i>AtEPR1</i>   | <a href="#">At2g27380</a> | A                       | 0.903           |
| <i>AtPER</i>    | <a href="#">At1g48130</a> | A                       | 0.943           |
| <i>TIP4</i>     | <a href="#">At4g34270</a> | B                       | 0.903           |
| <i>YLS8</i>     | <a href="#">AT5G08290</a> | B                       | 0.968           |
| <i>ACT2</i>     | <a href="#">At3g18780</a> | E                       | 1.011           |

| Thermal cycle condition A. | Tm (°C)        | Duration (s)         | Cycle #                                             |
|----------------------------|----------------|----------------------|-----------------------------------------------------|
| Initial denaturation       | 95             | 5:00                 | 1                                                   |
| Amplification segment      | 95<br>60       | 0:05<br>0:45         | 40                                                  |
| Dissociation segment       | 95<br>55<br>95 | 1:00<br>0:30<br>0:30 | 1 cycle data point every 0.5 °C between 55°C – 95°C |

| Thermal cycle condition B | Tm (°C)        | Duration (s)         | Cycle #                                             |
|---------------------------|----------------|----------------------|-----------------------------------------------------|
| Initial denaturation      | 95             | 5:00                 | 1                                                   |
| Amplification segment     | 95<br>60       | 0:05<br>1:00         | 40                                                  |
| Dissociation segment      | 95<br>55<br>95 | 1:00<br>0:30<br>0:30 | 1 cycle data point every 0.5 °C between 55°C – 95°C |

**Thermal cycle  
condition C**

---

|                      |    |      |                                                              |
|----------------------|----|------|--------------------------------------------------------------|
| Initial denaturation | 95 | 5:00 | 1                                                            |
| Amplification        | 95 | 0:05 | 40                                                           |
| segment              | 60 | 0:35 |                                                              |
| Dissociation         | 95 | 1:00 | 1 cycle data point<br>every 0.5 °C<br>between 55°C –<br>95°C |
| segment              | 55 | 0:30 |                                                              |
|                      | 95 | 0:30 |                                                              |

**Thermal cycle  
condition D**

---

|                      |    |      |                                                              |
|----------------------|----|------|--------------------------------------------------------------|
| Initial denaturation | 95 | 5:00 | 1                                                            |
| Amplification        | 95 | 0:05 | 40                                                           |
| segment              | 60 | 0:45 |                                                              |
| Dissociation         | 95 | 1:00 | 1 cycle data point<br>every 0.5 °C<br>between 55°C –<br>95°C |
| segment              | 55 | 0:30 |                                                              |
|                      | 95 | 0:30 |                                                              |

**Thermal cycle  
condition E**

---

|                      |    |       |                                                              |
|----------------------|----|-------|--------------------------------------------------------------|
| Initial denaturation | 95 | 10:00 | 1                                                            |
| Amplification        | 95 | 0:30  | 40                                                           |
| segment              | 55 | 1:00  |                                                              |
|                      | 72 | 0:30  |                                                              |
| Dissociation         | 95 | 1:00  | 1 cycle data point<br>every 0.5 °C<br>between 55°C –<br>95°C |
| segment              | 55 | 0:30  |                                                              |
|                      | 95 | 0:30  |                                                              |

**Supplemental Table 2. Primer sequences, amplicon length and measured amplicon melting temperature.**

| Gene Name       | AGI Number                | 5'⇒3' Primer Sequences (F/R)                                | Amplicon Length (bp) | Amplicon T <sub>m</sub> (°C) |
|-----------------|---------------------------|-------------------------------------------------------------|----------------------|------------------------------|
| <i>AtNOS1</i>   | <a href="#">At3g47450</a> | CCTGGAACCACCTTGGG/<br>GCTCTCACCCCTTGGGACTAC                 | 213                  | 82.35                        |
| <i>AtCPI1</i>   | <a href="#">At4g36880</a> | AGCCTCCAAATCCGGTAAAGT<br>CCCAAATGTTTATCGAGCGT               | 126                  | 81.1                         |
| <i>AtGA3ox1</i> | <a href="#">At1g15550</a> | ACGTTGGTGACCTCTTCCAC<br>TATAGAGGCGATTCAACGGG                | 175                  | 82.35                        |
| <i>AtGA3ox2</i> | <a href="#">At1g80340</a> | GTTTCACCGTTATTGGCTCTCC<br>TCACAGTATTTGAGGTGGTGGC            | 73                   | 79.6                         |
| <i>ICL</i>      | <a href="#">At3g21720</a> | GGGAAAAGGTGTCACTGAAGAACAG<br>CGCACCGCCGTAATGAACATA          | 132                  | 81.85                        |
| <i>MS</i>       | <a href="#">At5g03860</a> | TTATAACTCCGGTGCCGTTCTT<br>ACAAAGCGTCCTCGAAATCAGC            | 196                  | 84                           |
| <i>AtEPRI</i>   | <a href="#">At2g27380</a> | GTCCCACTAATAGATTTCTTGAGATTCTT<br>GCGTGACCACTATCAGTCTCATACTT | 122                  | 77.7                         |
| <i>AtPER</i>    | <a href="#">At1g48130</a> | ACGGGACGTAACATGGACGAAGTA<br>ACGCAGATAGCCTTTCTTTGACGG        | 207                  | 83.35                        |
| <i>TIP4</i>     | <a href="#">At4g34270</a> | AGTTGACTTAGCAGTCTGGAGCGA<br>ATGGTGGGAACAAGGTAGGGAACA        | 297                  | 79.85                        |
| <i>YLS8</i>     | <a href="#">AT5G08290</a> | CCGTTACTAATCGAGCTTCCCAAC<br>GGAGAACAACCGAAACAGTAAGCA        | 158                  | 77.85                        |
| <i>ACT2</i>     | <a href="#">At3g18780</a> | CTT ACA ATT TCC CGC TCT GC<br>GTT GGG ATG AAC CAG AAG GA    | 477                  | 83.2                         |
